# Supplementary material for: Comparative transcriptome analysis of Eogammarus possjeticus at different hydrostatic pressure and temperature exposures
Source: PubMed Central journal article supplement (PMC6401005; doi:10.1038/s41598-019-39716-y), 2019-03-05
Supplement: 41598_2019_39716_MOESM1_ESM.pdf [file 41598_2019_39716_MOESM1_ESM.pdf]

## Title page

# Comparative transcriptome analysis of *Eogammarus possjeticus* at different hydrostatic pressure and temperature exposures

Jiawei Chen<sup>1,2</sup>, Helu Liu<sup>1</sup>, Shanya Cai<sup>1,2</sup> and Haibin Zhang<sup>1,\*</sup>

<sup>1</sup> Institute of Deep-sea Science and Engineering, Chinese Academy of Sciences, Sanya 572000, China

<sup>2</sup> University of Chinese Academy of Sciences, Beijing 100049, China

**\*Author for correspondence:** Haibin Zhang, Institute of Deep-sea Science and Engineering, Chinese Academy of Sciences, Sanya 572000, China

E-mail: hzhang@idsse.ac.cn

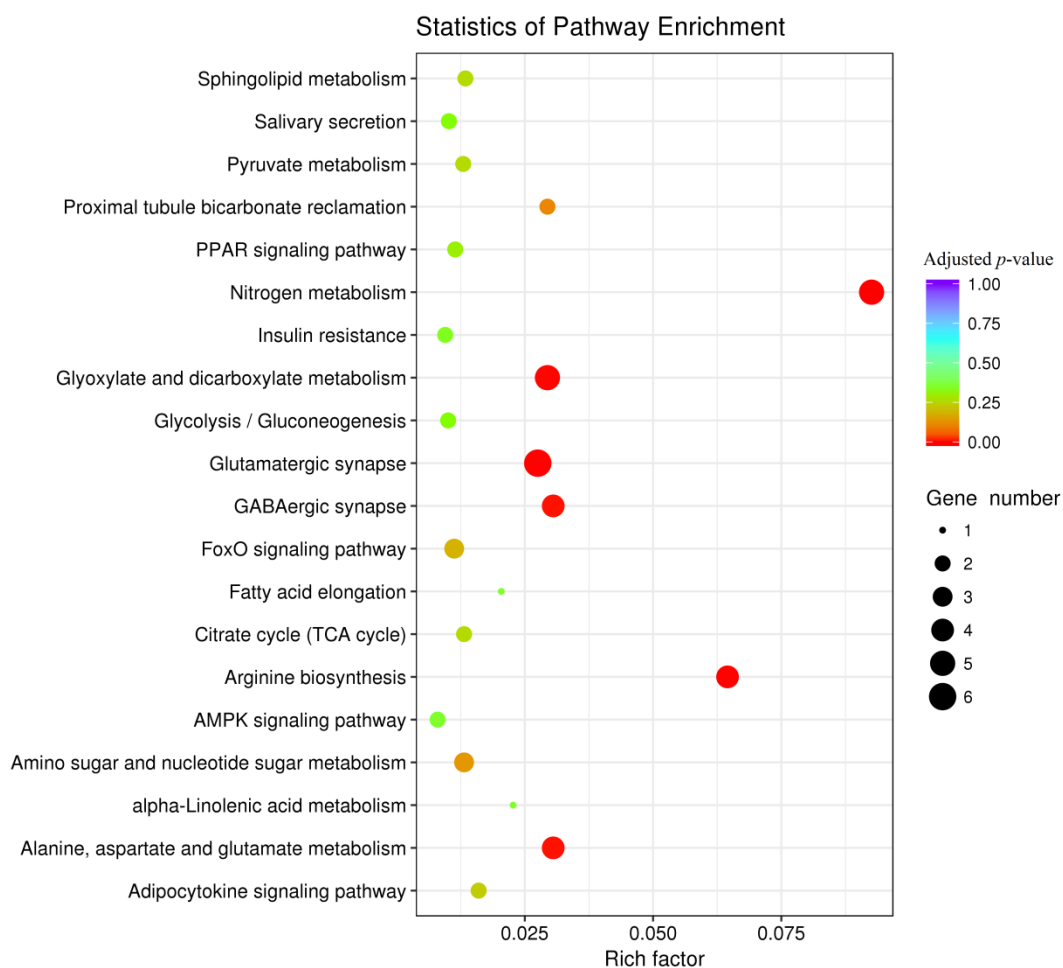

**Figure S1.** Results of KEGG enrichment of 94 well-annotated differential expression genes. KEGG: Kyoto Encyclopedia of Genes and Genomes.
