# Supplementary material for: Comparative transcriptome analysis of Eogammarus possjeticus at different hydrostatic pressure and temperature exposures
Source: PubMed Central journal article supplement (PMC6401005; doi:10.1038/s41598-019-39716-y), 2019-03-05
Supplement: 41598_2019_39716_MOESM4_ESM.pdf [file 41598_2019_39716_MOESM4_ESM.pdf]

## Title page

# Comparative transcriptome analysis of *Eogammarus possjeticus* at different hydrostatic pressure and temperature exposures

Jiawei Chen<sup>1,2</sup>, Helu Liu<sup>1</sup>, Shanya Cai<sup>1,2</sup> and Haibin Zhang<sup>1,\*</sup>

<sup>1</sup> Institute of Deep-sea Science and Engineering, Chinese Academy of Sciences, Sanya 572000, China

<sup>2</sup> University of Chinese Academy of Sciences, Beijing 100049, China

**\*Author for correspondence:** Haibin Zhang, Institute of Deep-sea Science and Engineering, Chinese Academy of Sciences, Sanya 572000, China

E-mail: hzhang@idsse.ac.cn

**Table S3.** Information of the primers used in quantitative real-time reverse transcription-PCR (qPCR) analysis (with *Rpl8* as internal control). PCC: Pearson correlation coefficients between qPCR and RNA-Seq.

| Gene name         | Gene ID             | PCC  | 5'- 3' forward primer      | 5'- 3' reverse primer       |
|-------------------|---------------------|------|----------------------------|-----------------------------|
| <i>Rpl8</i>       | Cluster-13637.43027 |      | GCAGCAAGAAGATCCTCCCGTCCAA  | ACACGGCAGGCAAACGAATCCAACG   |
| <i>GS</i>         | Cluster-13637.55967 | 0.90 | GCCATCCACATATCGTCACCCAT    | CACTCGCCAAAGACCAACATCCT     |
| <i>PEPCK</i>      | Cluster-13637.35569 | 0.86 | ATTGTCTTTCCGGGTCAGGCTACGGT | AGTGAAGGAGTCATCATCGCCAGGT   |
| Peroxidase        | Cluster-13637.45510 | 0.99 | AGGTGCCGTCTATGGTGCGGTATTT  | CCACGAACAGGCTCTTCAGGTCAA    |
| Crustin pm5       | Cluster-13637.44495 | 0.96 | ACGATGGCAGGCTTGCATGAGTG    | TGTTGCTGGCGTGTGTAGTGGCT     |
| Lysozyme          | Cluster-13637.42497 | 0.90 | TTACAACATTACCACCAACAAGG    | ACCAGTCGGACAGAAACAGAGGCTA   |
| <i>Hsp70</i>      | Cluster-13637.44177 | 0.93 | TCCACTGCTGGTGACACTCATCTT   | ATCGGCACAGAGCTCCTCAAACCTA   |
| <i>CA</i>         | Cluster-13637.39561 | 0.98 | GCTGCCCTGGTAGCGGTAGAAAT    | TTGGATGACGCCCTGGGCCACGAAGAC |
| <i>A2M</i>        | Cluster-13637.43635 | 0.89 | GTAACGACGATCCCTGTTGAAAGA   | AGAAACCAGAAGCACCCAAACCACT   |
| <i>ATPIA</i>      | Cluster-13637.41266 | 0.84 | CATCGCTAAGGAGATCGCTCATTTT  | ACATGTGGGCGACAGTCATACGGTT   |
| <i>CALM</i>       | Cluster-13637.38529 | 0.82 | TCCACCTCCTCGTCTGTCAACTTCTC | GACGGTAACGGCACAATCGACTTCC   |
| Peritrophin       | Cluster-13637.45283 | 0.85 | GAGCAACTACGAGTGTCCTCAAGCCA | CCATCTCCTCCGATTTCTCAGTGT    |
| Clottable protein | Cluster-13637.43258 | 0.90 | AGTTAGTCCGAATCCGCTCACAATC  | CCTCACCAACATCACTTCTACCTCCTT |
| <i>IDH3</i>       | Cluster-13637.43931 | 0.88 | TTGTGCACGGCGGTGACTTTCTTAC  | GCAATGGAATCTGCCTGAAGGGAAT   |
| Enolase           | Cluster-13637.42843 | 0.77 | CTGCTCACTTCATTCCTCCACACC   | GCTCAGAGAGGCTGGCCAAGTACAA   |
| <i>HmgA</i>       | Cluster-13637.51258 | 0.90 | GATGGGTTTTGTACCTCTGTCTT    | TGTCCATTTGGGAGTAGAAGCGA     |
| Ring finger       | Cluster-13637.39981 | 0.80 | TTCAATCGAGGACGGAGAGATGGAC  | CGAGTACGACAGCAGCAGCACAC     |
| Vitellogenin      | Cluster-13637.41706 | 0.97 | AACTACTCAAGCAGAACCGAACATT  | TCTTCAGTATCGGCTCCCTCAGTTG   |
| <i>WAP</i>        | Cluster-13637.37987 | 0.89 | GCCTTCTGTCTCATGCAGGTGTAG   | CTCGCTGTGCTGTGGTCTGTGT      |
| <i>MDH</i>        | Cluster-13637.45447 | 0.79 | GCACCCTCCATCCCAAGGAAAACCT  | TTCTTACCTCGGAGACAGGCACCC    |
| <i>ATPeV0A</i>    | Cluster-13637.35182 | 0.99 | CAACAAGTTCACCTTCGGCTTCCAG  | ACGCTCCTCAGCACCATCCACAGA    |
| <i>ATPeV1B</i>    | Cluster-13637.60972 | 0.96 | ATGAAGGCTGTGGTGGGCGAAGAAG  | CACACAAACCAATAAACCTACGAG    |
| <i>ATPeV1C</i>    | Cluster-13637.45517 | 0.99 | CCTTGCTGAAGAGGGTGACCGAGAA  | GGGAGACCTGGTGAAGAAAAGTGAC   |
| <i>AMP</i>        | Cluster-13637.45969 | 0.92 | TTGGGTGAGTAAGGATTTCGATTGG  | ACGCATACTTGGTAATGACGACTAA   |
