# Supplementary material for: Comparative transcriptome analysis of Eogammarus possjeticus at different hydrostatic pressure and temperature exposures
Source: PubMed Central journal article supplement (PMC6401005; doi:10.1038/s41598-019-39716-y), 2019-03-05
Supplement: 41598_2019_39716_MOESM5_ESM.pdf [file 41598_2019_39716_MOESM5_ESM.pdf]

## Title page

### Comparative transcriptome analysis of *Eogammarus possjeticus* at different hydrostatic pressure and temperature exposures

Jiawei Chen<sup>1,2</sup>, Helu Liu<sup>1</sup>, Shanya Cai<sup>1,2</sup> and Haibin Zhang<sup>1,\*</sup>

<sup>1</sup> Institute of Deep-sea Science and Engineering, Chinese Academy of Sciences, Sanya 572000, China

<sup>2</sup> University of Chinese Academy of Sciences, Beijing 100049, China

**\*Author for correspondence:** Haibin Zhang, Institute of Deep-sea Science and Engineering, Chinese Academy of Sciences, Sanya 572000, China

E-mail: hzhang@idsse.ac.cn

**Table S4.** Quality of sequencing. T20P0.1: 20 °C, 0.1 MPa; T20P15: 20 °C, 15 MPa; T15P0.1: 15 °C, 0.1 MPa; T15P15: 15 °C, 15 MPa; T10P0.1: 10 °C, 0.1 MPa; T10P15: 10 °C, 15 MPa.

| Sample  | Raw Reads   | Clean reads | Clean bases | Error(%) | Q20(%) | Q30(%) | GC(%) |
|---------|-------------|-------------|-------------|----------|--------|--------|-------|
| T20P0.1 | 103,330,674 | 98,730,068  | 14.81G      | 0.02     | 95.41  | 88.83  | 42.93 |
| T20P15  | 108,885,900 | 104,024,668 | 15.6G       | 0.02     | 95.57  | 89.16  | 42.15 |
| T15P0.1 | 104,172,774 | 98,208,320  | 14.73G      | 0.02     | 95.35  | 88.76  | 43.1  |
| T15P15  | 97,029,846  | 92,706,622  | 13.91G      | 0.03     | 95.24  | 88.52  | 43.01 |
| T10P0.1 | 98,752,258  | 94,307,414  | 14.15G      | 0.02     | 95.26  | 88.48  | 40.23 |
| T10P15  | 99,222,460  | 93,812,168  | 14.07G      | 0.02     | 95.99  | 90.27  | 42.57 |
