# Supplementary material for: Comparative transcriptome analysis of Eogammarus possjeticus at different hydrostatic pressure and temperature exposures
Source: PubMed Central journal article supplement (PMC6401005; doi:10.1038/s41598-019-39716-y), 2019-03-05
Supplement: 41598_2019_39716_MOESM7_ESM.pdf [file 41598_2019_39716_MOESM7_ESM.pdf]

## Title page

### Comparative transcriptome analysis of *Eogammarus possjeticus* at different hydrostatic pressure and temperature exposures

Jiawei Chen<sup>1,2</sup>, Helu Liu<sup>1</sup>, Shanya Cai<sup>1,2</sup> and Haibin Zhang<sup>1,\*</sup>

<sup>1</sup> Institute of Deep-sea Science and Engineering, Chinese Academy of Sciences, Sanya 572000, China

<sup>2</sup> University of Chinese Academy of Sciences, Beijing 100049, China

**\*Author for correspondence:** Haibin Zhang, Institute of Deep-sea Science and Engineering, Chinese Academy of Sciences, Sanya 572000, China

E-mail: hzhang@idsse.ac.cn

**Table S6.** Summary of annotation results of unigenes in seven databases, including NCBI non-redundant protein sequences (Nr), NCBI non-redundant nucleotide sequences (Nt), A manually annotated and reviewed protein sequence database (Swiss Prot), euKaryotic Ortholog Groups (KOG), Protein family (Pfam), Kyoto Encyclopedia of Genes and Genomes (KEGG), and Gene Ontology (GO).

|                                    | Number of unigenes | Percentage (%) |
|------------------------------------|--------------------|----------------|
| Annotated in Nr                    | 42, 726            | 30.89          |
| Annotated in Nt                    | 11, 510            | 8.32           |
| Annotated in KEGG                  | 21, 632            | 15.64          |
| Annotated in Swiss Prot            | 34, 333            | 24.82          |
| Annotated in Pfam                  | 47, 686            | 34.48          |
| Annotated in GO                    | 48, 339            | 34.95          |
| Annotated in KOG                   | 21, 552            | 15.58          |
| Annotated in all Databases         | 6, 090             | 4.40           |
| Annotated in at least one Database | 60, 928            | 44.05          |
